# Supplementary material
Source: PubMed Central journal article supplement (PMC3557933)
Supplement: jp3094935_si_001.pdf [file jp3094935_si_001.pdf]

## Supporting Information

### *Normal Mode Analysis of the Spectral Density of the Fenna-Matthews-Olson Light-Harvesting Protein: How the Protein Dissipates the Excess Energy of Excitons*

Thomas Renger,<sup>\*,†</sup> Alexander Klinger,<sup>†</sup> Florian Steinecker,<sup>†</sup> Marcel Schmidt am Busch,<sup>†</sup> Jorge Numata,<sup>‡</sup> and Frank Müh<sup>†</sup>

*Institut für Theoretische Physik, Johannes Kepler Universität Linz, Altenberger Str. 69, 4040 Linz, Austria, and Institut für Chemie und Biochemie, Freie Universität Berlin, Fabeckstr. 36A, D-14195 Berlin*

E-mail: thomas.renger@jku.at

---

<sup>\*</sup>To whom correspondence should be addressed

<sup>†</sup>Institut für Theoretische Physik, Johannes Kepler Universität Linz, Altenberger Str. 69, 4040 Linz, Austria

<sup>‡</sup>Institut für Chemie und Biochemie, Freie Universität Berlin, Fabeckstr. 36A, D-14195 Berlin

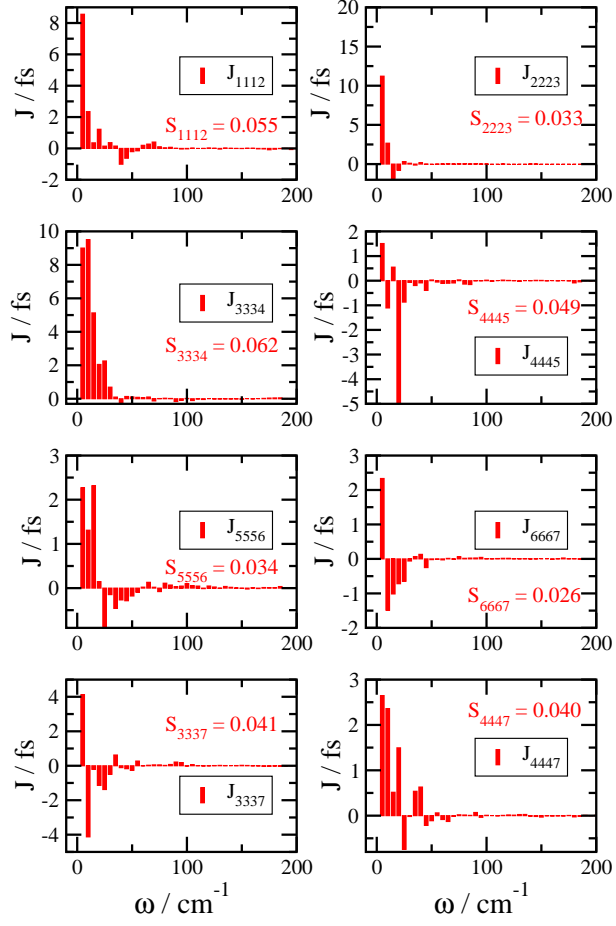

**Figure S1:** Spectral densities  $J_{mkl}(\omega)$  characterizing the correlation in fluctuations of site energies of pigment  $m$  with fluctuations of excitonic couplings between pigments  $k$  and  $l$ . The  $J_{mkl}(\omega)$  with the largest generalized Huang-Rhys factors  $S_{mkl}$  (eq 39) are shown.

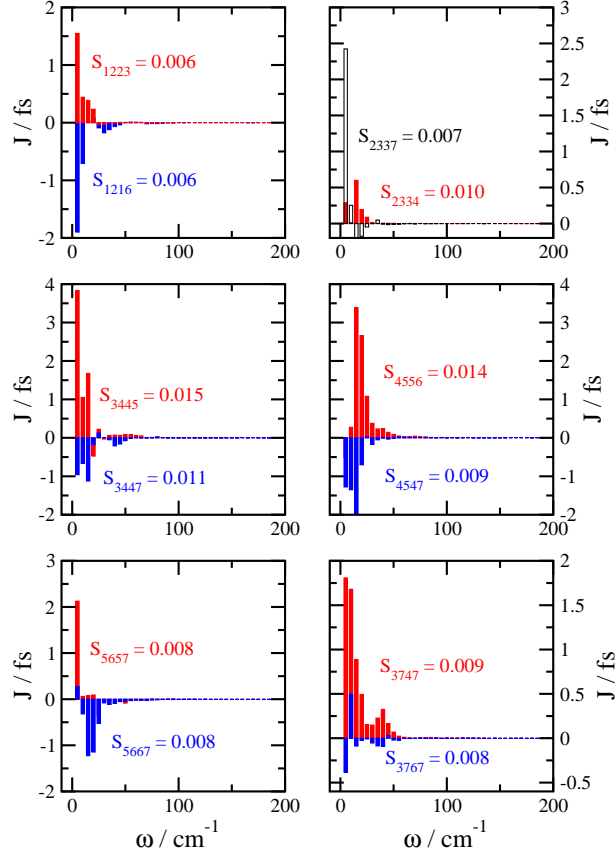

**Figure S2:** Spectral densities  $J_{mnlk}(\omega)$  characterizing the correlations of excitonic couplings between pigments  $m$  and  $n$  with those of pigments  $k$  and  $l$  are shown for those with the largest generalized Huang Rhys factors  $S_{mnlk}$  (eq 39).
